# Supplementary material for: Prevalence and Prognostic Significance of Hyponatremia in Patients with Acute Exacerbation of Chronic Obstructive Pulmonary Disease: Data from the Akershus Cardiac Examination (ACE) 2 Study
Source: PubMed Central journal article supplement (PMC4987051; doi:10.1371/journal.pone.0161232), 2016-08-16
Supplement: pone.0161232.s003.pdf [file pone.0161232.s003.pdf]

**S1 Table. Logistic regression for the presence of hyponatremia in the derivation cohort (ACE 2 study)**

|                                                 | Patients with acute exacerbation of COPD (n=83) |      | Patients with acute heart failure (n=143) |       |
|-------------------------------------------------|-------------------------------------------------|------|-------------------------------------------|-------|
|                                                 | Odds ratio (95% CI)                             | P    | Odds ratio (95% CI)                       | P     |
| <b><i>Clinical findings at admission:</i></b>   |                                                 |      |                                           |       |
| Age (years)                                     | 1.02 (0.96-1.07)                                | 0.58 | 1.05 (1.00-1.09)                          | 0.05  |
| Male sex                                        | 0.72 (0.26-1.97)                                | 0.52 | 0.27 (0.12-0.63)                          | 0.003 |
| Body mass index (Kg/m <sup>2</sup> )            | 0.96 (0.88-1.04)                                | 0.34 | 0.86 (0.78-0.95)                          | 0.002 |
| Heart rate (per 5 beats/minute)                 | 1.09 (0.95-1.24)                                | 0.23 | 0.99 (0.92-1.07)                          | 0.82  |
| Mean arterial blood pressure (per 5 mmHg)       | 1.03 (0.90-1.18)                                | 0.66 | 0.97 (0.87-1.07)                          | 0.50  |
| Peripheral edema                                | 0.54 (0.19-1.57)                                | 0.26 | 0.64 (0.28-1.44)                          | 0.28  |
| Pre-hospital SpO <sub>2</sub> (%)               | 0.99 (0.94-1.05) <sup>†</sup>                   | 0.83 | 1.06 (0.85-1.32) <sup>‡</sup>             | 0.61  |
| NYHA class IV vs. II-III                        | 0.89 (0.33-2.38)                                | 0.82 | 1.37 (0.61-3.10)                          | 0.45  |
| <b><i>Heart and lung function:</i></b>          |                                                 |      |                                           |       |
| LVEF (%)                                        | 1.05 (0.95-1.15) <sup>†</sup>                   | 0.34 | 1.02 (0.99-1.05)                          | 0.27  |
| FEV <sub>1</sub> (per 100 mL)                   | 0.97 (0.87-1.09)                                | 0.64 | n.a.                                      |       |
| FEV <sub>1</sub> % of predicted (per 10 %)      | 0.96 (0.71-1.31)                                | 0.81 | n.a.                                      |       |
| FEV <sub>1</sub> /FVC (per 10%)                 | 1.04 (0.74-1.46)                                | 0.81 | n.a.                                      |       |
| <b><i>Smoking:</i></b>                          |                                                 |      |                                           |       |
| Current vs. previous and never                  | 1.99 (0.73-5.43)                                | 0.18 | 1.59 (0.62-4.07)                          | 0.33  |
| Never vs. current and previous                  | n.a.                                            |      | 1.54 (0.64-3.70)                          | 0.33  |
| <b><i>History of:</i></b>                       |                                                 |      |                                           |       |
| Diabetes mellitus                               | 0.32 (0.04-2.68)                                | 0.29 | 0.69 (0.27-1.76)                          | 0.44  |
| Heart failure                                   | 0.77 (0.15-4.03)                                | 0.76 | 0.52 (0.23-1.19)                          | 0.12  |
| Coronary artery disease                         | 1.61 (0.57-4.54)                                | 0.37 | 0.87 (0.38-1.96)                          | 0.73  |
| Hypertension                                    | 3.07 (1.11-8.50)                                | 0.03 | 0.84 (0.37-1.91)                          | 0.68  |
| COPD                                            | n.a.                                            |      | 0.78 (0.34-1.81)                          | 0.57  |
| <b><i>Medication at admission:</i></b>          |                                                 |      |                                           |       |
| Beta-blocker                                    | 0.72 (0.26-2.02)                                | 0.53 | 0.99 (0.43-2.30)                          | 0.98  |
| ACEi/ARB                                        | 2.16 (0.79-5.91)                                | 0.14 | 1.91 (0.78-4.67)                          | 0.16  |
| Thiazide diuretic                               | 2.04 (0.52-8.04)                                | 0.31 | 2.22 (0.75-6.53)                          | 0.15  |
| Loop diuretic                                   | 1.17 (0.42-3.25)                                | 0.76 | 1.07 (0.44-2.57)                          | 0.88  |
| Aldosterone antagonist                          | 1.43 (0.24-8.38)                                | 0.70 | 2.27 (0.82-6.29)                          | 0.11  |
| <b><i>Laboratory findings at admission:</i></b> |                                                 |      |                                           |       |
| Arterial pH (per 0.1)                           | 1.20 (0.45-3.22)                                | 0.71 | 0.87 (0.37-2.03)                          | 0.75  |
| Arterial pO <sub>2</sub> (kPa)                  | 0.88 (0.69-1.12)                                | 0.29 | 1.23 (1.01-1.51)                          | 0.04  |
| Arterial pCO <sub>2</sub> (kPa)                 | 1.04 (0.82-1.31)                                | 0.75 | 0.95 (0.65-1.40)                          | 0.79  |

|                                        |                  |      |                  |       |
|----------------------------------------|------------------|------|------------------|-------|
| Glucose (mmol/L)                       | 0.92 (0.74-1.15) | 0.47 | 0.82 (0.66-1.01) | 0.07  |
| K <sup>+</sup> (mmol/L)                | 1.34 (0.50-3.60) | 0.57 | 1.43(0.71-2.86)  | 0.32  |
| Creatinine clearance (mL/min)          | 1.00 (0.98-1.02) | 1.00 | 0.99 (0.97-1.00) | 0.045 |
| C-reactive protein (mg/L) <sup>a</sup> | 1.29 (0.95-1.75) | 0.11 | 1.05 (0.80-1.38) | 0.75  |
| NT-proBNP (pg/mL) <sup>a</sup>         | 1.24 (0.86-1.78) | 0.25 | 1.09 (0.80-1.48) | 0.59  |
| hs-TnT (ng/L) <sup>a</sup>             | 0.82 (0.45-1.48) | 0.51 | 1.25 (0.83-1.88) | 0.28  |

**Significant risk factors after multivariate analysis**

|                                      |                  |      |                  |       |
|--------------------------------------|------------------|------|------------------|-------|
| History of hypertension              | 3.07 (1.11-8.50) | 0.03 | n.s.             |       |
| Body mass index (Kg/m <sup>2</sup> ) | n.s.             |      | 0.83 (0.75-0.93) | 0.001 |

Odds ratios are expressed per unit (yes vs. no for binary variables) unless otherwise specified.

<sup>a</sup> Log transformed because of severe right skew; <sup>†</sup> Missing = 10-50%; <sup>‡</sup> Missing = 51-85%. Hyponatremia is defined as Na<sup>+</sup> < 137 mmol/L after correction for hyperglycemia by the Hillier formula.

Abbreviations: ACE 2 Study, Akershus Cardiac Examination 2 Study; ACEi, angiotensin-converting-enzyme inhibitor; ARB, angiotensin II receptor blocker; CI, confidence interval; COPD, chronic obstructive pulmonary disease; FEV<sub>1</sub>, forced expiratory volume in one second; FVC, forced vital capacity; hs-TnT, high sensitivity troponin T; LVEF, left ventricular ejection fraction; n.a., not applicable (missing data > 85% for FEV<sub>1</sub> and FVC in acute HF, all subjects with acute exacerbation of COPD had a history of COPD and only 3 of them had never smoked ); n.s., not statistically significant.; NT-proBNP, N-terminal pro-B-type natriuretic peptide; NYHA, New York Heart Association; pCO<sub>2</sub>, partial pressure of carbon dioxide; pO<sub>2</sub>, partial pressure of oxygen; SpO<sub>2</sub>, peripheral capillary oxygen saturation; vs., versus.
