# Supplementary material for: Prevalence and Prognostic Significance of Hyponatremia in Patients with Acute Exacerbation of Chronic Obstructive Pulmonary Disease: Data from the Akershus Cardiac Examination (ACE) 2 Study
Source: PubMed Central journal article supplement (PMC4987051; doi:10.1371/journal.pone.0161232), 2016-08-16
Supplement: pone.0161232.s004.pdf [file pone.0161232.s004.pdf]

**S2 Table. Hyponatremia sensitivity and specificity for predicting death at different Na<sup>+</sup> cut-offs and corresponding hazard ratios in acute exacerbation of COPD (ACE 2 Study)**

| <b>Na<sup>+</sup> cut-off</b> | <b><i>Sensitivity (%)</i></b> | <b><i>Specificity (%)</i></b> | <b><i>Correctly classified (%)</i></b> | <b><i>Youden's index</i></b> | <b><i>Hazard ratio<sup>†</sup> (95% CI)</i></b> | <b><i>P</i></b> |
|-------------------------------|-------------------------------|-------------------------------|----------------------------------------|------------------------------|-------------------------------------------------|-----------------|
| Na <sup>+</sup> < 138 mmol/L  | 40.0                          | 60.4                          | 51.8                                   | 0.04                         | 1.02 (0.52-2.03)                                | 0.95            |
| Na <sup>+</sup> < 137 mmol/L  | 25.7                          | 72.9                          | 53.0                                   | -0.01                        | 1.00 (0.47-2.15)                                | 1.00            |
| Na <sup>+</sup> < 136 mmol/L  | 25.7                          | 77.1                          | 55.4                                   | 0.03                         | 1.16 (0.54-2.48)                                | 0.71            |
| Na <sup>+</sup> < 135 mmol/L  | 25.7                          | 83.3                          | 59.2                                   | 0.09                         | 1.52 (0.71-3.26)                                | 0.62            |
| Na <sup>+</sup> < 134 mmol/L  | 22.9                          | 87.5                          | 60.2                                   | 0.10                         | 1.58 (0.71-3.50)                                | 0.26            |
| Na <sup>+</sup> < 133 mmol/L  | 14.3                          | 91.7                          | 59.0                                   | 0.06                         | 1.29 (0.50-3.34)                                | 0.56            |
| Na <sup>+</sup> < 132 mmol/L  | 8.6                           | 93.8                          | 57.8                                   | 0.02                         | 1.11 (0.34-3.66)                                | 0.86            |
| Na <sup>+</sup> < 131 mmol/L* | 8.6                           | 93.8                          | 57.8                                   | 0.02                         | 1.11 (0.34-3.66)                                | 0.86            |
| Na <sup>+</sup> < 130 mmol/L  | 8.6                           | 95.8                          | 59.0                                   | 0.04                         | 1.48 (0.45-4.87)                                | 0.52            |

\* None of the subjects had Na<sup>+</sup> = 131 mmol/L, thus the results are the same as for 132 mmol/L; <sup>†</sup> Hazard ratio by Cox regression analysis
