# Supplementary material for: Prevalence and Prognostic Significance of Hyponatremia in Patients with Acute Exacerbation of Chronic Obstructive Pulmonary Disease: Data from the Akershus Cardiac Examination (ACE) 2 Study
Source: PubMed Central journal article supplement (PMC4987051; doi:10.1371/journal.pone.0161232), 2016-08-16
Supplement: pone.0161232.s005.pdf [file pone.0161232.s005.pdf]

**S3 Table. Minimal detectable HR per unit reduction of Na<sup>+</sup> and for the presence of hyponatremia**

| Variable                                    | Power (%) | Hazard ratio*              |                           |                                         |                   |
|---------------------------------------------|-----------|----------------------------|---------------------------|-----------------------------------------|-------------------|
|                                             |           | AECOPD Derivation<br>N= 83 | AECOPD Validation<br>N=99 | AECOPD Derivation + validation<br>N=182 | Acute HF<br>N=143 |
| <i>Na<sup>+</sup> (per mmol/L decrease)</i> | 50        | 1.070                      | 1.059                     | 1.044                                   | 1.061             |
|                                             | 60        | 1.080                      | 1.067                     | 1.050                                   | 1.069             |
|                                             | 70        | 1.090                      | 1.076                     | 1.056                                   | 1.078             |
|                                             | 80        | 1.102                      | 1.086                     | 1.064                                   | 1.088             |
|                                             | 90        | 1.119                      | 1.100                     | 1.074                                   | 1.102             |
| <i>Na<sup>+</sup> &lt; 137 mmol/L</i>       | 50        | 1.942                      | 1.678                     | 1.502                                   | 1.621             |
|                                             | 60        | 2.116                      | 1.794                     | 1.583                                   | 1.726             |
|                                             | 70        | 2.320                      | 1.927                     | 1.675                                   | 1.845             |
|                                             | 80        | 2.583                      | 2.095                     | 1.789                                   | 1.995             |
|                                             | 90        | 2.998                      | 2.353                     | 1.960                                   | 2.224             |

\*Calculated Hazard ratios are based on actual sample size, mortality rate, and standard deviation for each cohort, and a two-sided significance level of  $\alpha=0.05$
